# Supplementary material
Source: PubMed Central journal article supplement (PMC5909650)

## Cardiomyocyte Specific Deletion of *Sirt1* Gene Sensitizes Myocardium to Ischemia and Reperfusion Injury

Lin Wang, Nanhu Quan, Wanqing Sun, Xu Chen, Courtney Cates, Thomas Rousselle, Xinchun Zhou, Xuezhong Zhao, Ji Li

### Materials and Methods

***icSIRT1* knockout mice generation:** The tamoxifen-inducible, cardiac-specific *SIRT1* knockout mice (*icSIRT1* KO) were produced as shown below by breeding *SIRT1*<sup>flox/flox</sup> mice (008041) and CreER<sup>T2</sup> (005657) mice that were purchased from Jackson Laboratory. Mice will be maintained on a 12 hour light/dark cycle in a controlled environment with water *ad libitum*. Animal procedures will be carried out with protocols approved by the Institutional Animal Care and Use Committee. The primers for genotyping:  $\alpha$ MHC-Cre: forward, 5'-CTAGGCCACAGAATTGAAAGATCT-3'; reverse, 5'-GTAGGTGGAAATTCTAGCATCATCC-3'. Transgene: forward, 5'-ATACCGGAGATCATGCAAGC; reverse, 5'-AGGTGGACCTGATCATGGAG-3'. *Sirt1*: forward, 5'-GGTTGACTTAGGTCTTGTCTG-3'; reverse, 5'-CGTCCCTTGTAATGTTTCCC-3'.

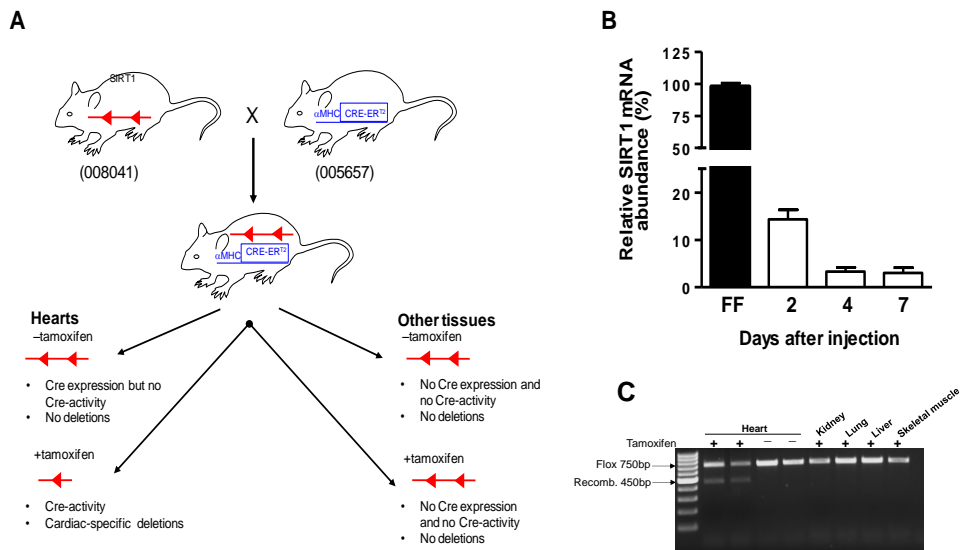

Tamoxifen-inducible disruption of *SIRT1* gene expression in the myocardium. Generation of cardiac-specific *SIRT1* KO mice after tamoxifen injection. **(A)** Scheme to achieve cardiac-specific deletions using the CreER<sup>T2</sup> system. A cardiac-specific promoter ( $\alpha$ MHC) drives the expression of a tamoxifen-inducible Cre recombinase (CreER<sup>T2</sup>). **(B)** *SIRT1* mRNA loss in KO left ventricle (LV). Mice received tamoxifen (5 x 0.08 mg/g i.p.); LV were harvested at the indicated time points (days). *SIRT1* transcript was quantified by RT-qPCR (each group n=3-5). **(C)** PCR analysis of genomic DNA from the hearts of double-heterozygous mice with or without tamoxifen. Genomic DNA was also analyzed from the brain, kidney, lung, liver and skeletal muscle from tamoxifen-treated double-heterozygous mice.

**Suppl Table 1.** Echocardiographic assessment of cardiac function of young, aged, icSIRT1 KO and aged + AAV-Sirt1 mice under normal physiological and ischemia/reperfusion conditions.

| Parameter (unit)                | Young         |                | Aged          |                 | icSIRT1 KO    |                 | Aged + AAV-Sirt1 |                  |
|---------------------------------|---------------|----------------|---------------|-----------------|---------------|-----------------|------------------|------------------|
|                                 | Sham          | I45'/R24h      | Sham          | I45'/R24h       | Sham          | I45'/R24h       | Sham             | I45'/R24h        |
| Heart rate (min <sup>-1</sup> ) | 419.2 ± 26.82 | 403.8 ± 29.75  | 363.5 ± 21.19 | 399.3 ± 7.881   | 430.5 ± 7.179 | 472.4 ± 52.66   | 369.7 ± 20.12    | 450.0 ± 4.950    |
| IVSd (mm)                       | 0.763 ± 0.042 | 0.753 ± 0.054  | 0.838 ± 0.073 | 0.773 ± 0.046   | 0.938 ± 0.078 | 0.805 ± 0.172   | 0.703 ± 0.092    | 0.757 ± 0.105    |
| IVSs (mm)                       | 0.912 ± 0.062 | 0.858 ± 0.060  | 1.010 ± 0.225 | 0.977 ± 0.019   | 1.083 ± 0.075 | 1.120 ± 0.055   | 0.993 ± 0.160    | 0.983 ± 0.039    |
| LVPWd (mm)                      | 0.768 ± 0.027 | 0.783 ± 0.063  | 0.880 ± 0.083 | 0.970 ± 0.075   | 0.978 ± 0.066 | 0.885 ± 0.091   | 0.803 ± 0.049    | 0.773 ± 0.077    |
| LVPWs (mm)                      | 0.980 ± 0.028 | 0.945 ± 0.109  | 1.130 ± 0.107 | 0.890 ± 0.158   | 1.125 ± 0.062 | 0.885 ± 0.194   | 0.997 ± 0.058    | 0.712 ± 0.087    |
| LVIDd (mm)                      | 3.560 ± 0.097 | 3.533 ± 0.221  | 3.858 ± 0.167 | 4.073 ± 0.458   | 3.693 ± 0.140 | 3.773 ± 0.329   | 4.287 ± 0.184    | 4.225 ± 0.250    |
| LVIDs (mm)                      | 2.863 ± 0.081 | 2.570 ± 0.206  | 2.898 ± 0.098 | 3.237 ± 0.309   | 2.678 ± 0.119 | 2.968 ± 0.312   | 3.270 ± 0.090    | 3.350 ± 0.348    |
| EF (%)                          | 62.47 ± 0.695 | 56.31 ± 2.569* | 57.69 ± 1.743 | 38.79 ± 1.824*† | 60.99 ± 1.166 | 46.26 ± 1.704*† | 53.80 ± 1.490    | 50.16 ± 2.570*†§ |
| FS (%)                          | 34.36 ± 0.963 | 26.06 ± 1.214* | 29.97 ± 1.137 | 18.46 ± 0.970*† | 29.87 ± 1.715 | 20.70 ± 1.082*† | 27.61 ± 1.014    | 25.32 ± 1.440*†§ |
| Body weight (g)                 | 26.49 ± 0.415 |                | 33.93 ± 0.911 |                 | 24.33 ± 0.827 |                 | 32.90 ± 1.331    |                  |

Values are means ± SEM, n=5-7, \*p<0.05 vs. Sham, †p<0.05 vs. young I/R, §p<0.05 vs. aged I/R.

**Suppl Table 2.** *Ex vivo* hemodynamic parameters of cardiac function of young, aged and icSIRT1 KO mice under basal and ischemia/reperfusion conditions.

| Parameter (unit)          | Young         |               | Aged           |                              | icSIRT1 KO     |                              |
|---------------------------|---------------|---------------|----------------|------------------------------|----------------|------------------------------|
|                           | Basal         | I/R           | Basal          | I/R                          | Basal          | I/R                          |
| Cardiac output (ml/min)   | 4.342 ± 0.885 | 3.990 ± 0.691 | 4.048 ± 0.865  | 2.190 ± 0.512 <sup>#</sup> † | 4.373 ± 0.100  | 2.449 ± 0.799 <sup>§</sup> † |
| Coronary flow (ml/min)    | 2.057 ± 0.079 | 1.810 ± 0.265 | 2.093 ± 0.057  | 1.640 ± 0.286                | 2.083 ± 0.062  | 1.603 ± 0.325                |
| Systolic pressure (mmHg)  | 80.04 ± 12.38 | 80.95 ± 12.95 | 75.60 ± 5.387  | 76.20 ± 4.320                | 73.10 ± 6.989  | 67.71 ± 8.133                |
| Diastolic pressure (mmHg) | 12.69 ± 4.237 | 14.98 ± 5.290 | 30.49 ± 8.705* | 39.50 ± 0.479†               | 32.02 ± 7.062* | 31.59 ± 6.897†               |
| Heart weight (wet, g)     | 0.1429±0.008  |               | 0.1828±0.0119  |                              | 0.1716±0.020   |                              |

Values are means ± SEM, n=5, \*p<0.05 vs. young basal; <sup>#</sup>p<0.05 vs. aged basal; <sup>§</sup>p<0.05 vs. icSIRT1 KO basal; †p<0.05 vs. young I/R.

Figure 1A

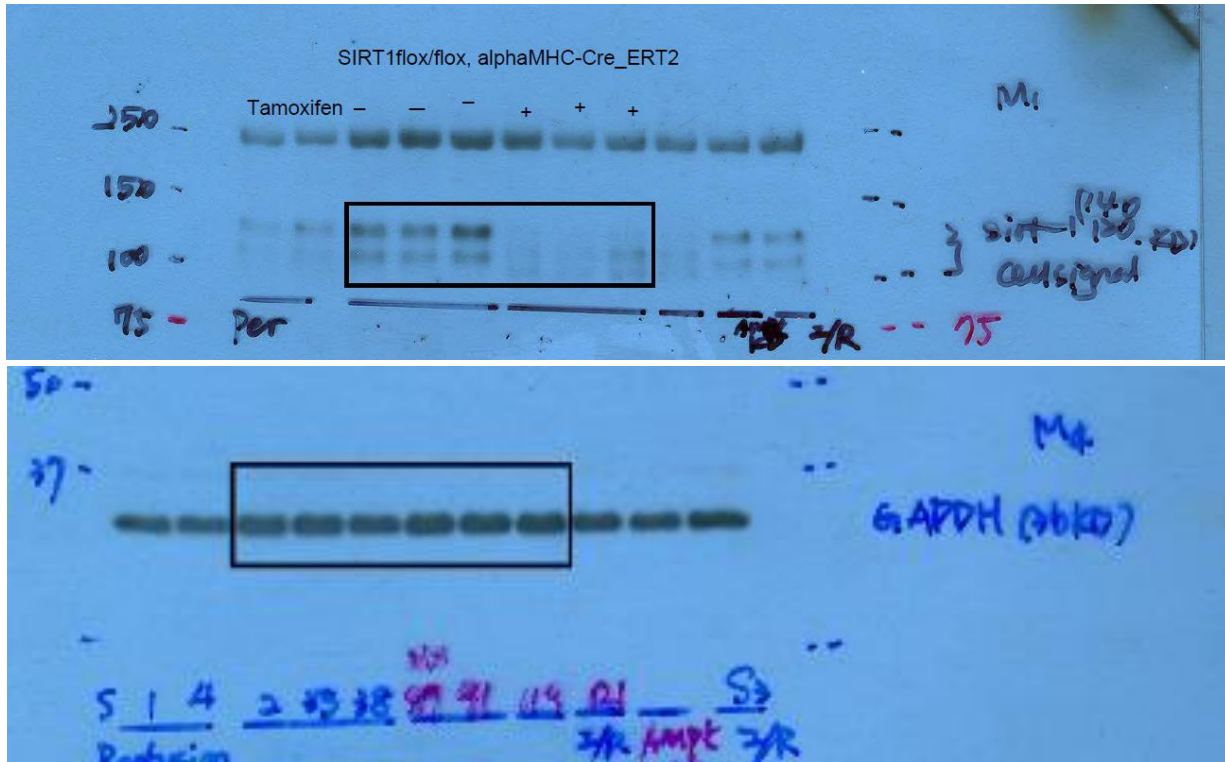

Figure 2A

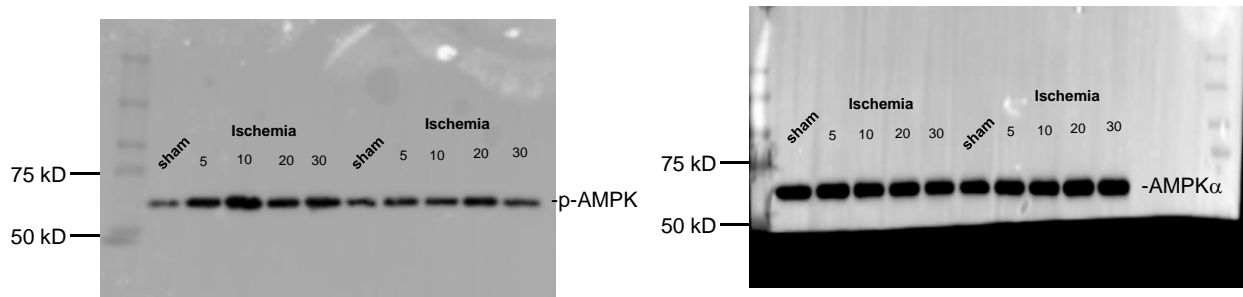

Figure 2B

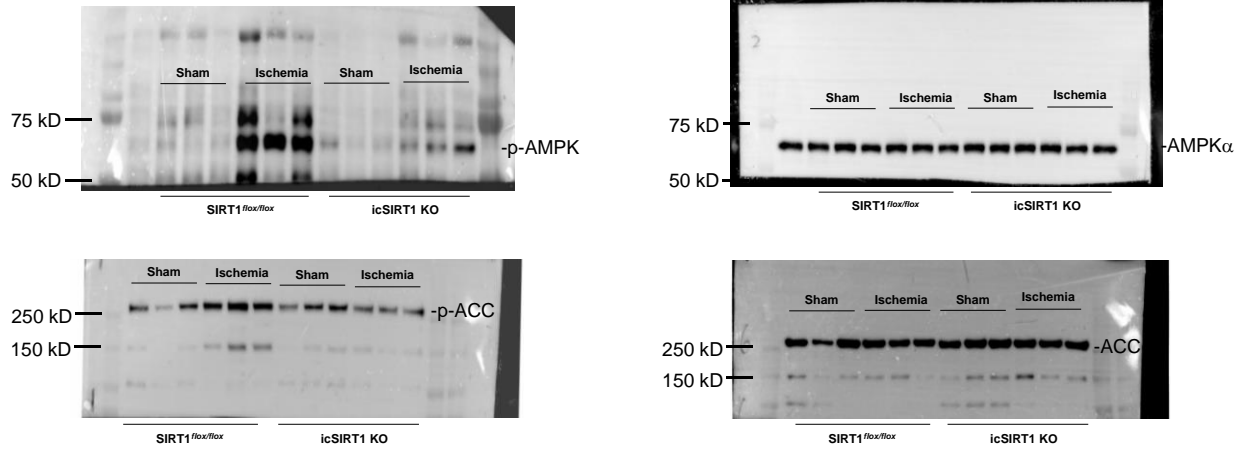

Figure 2C

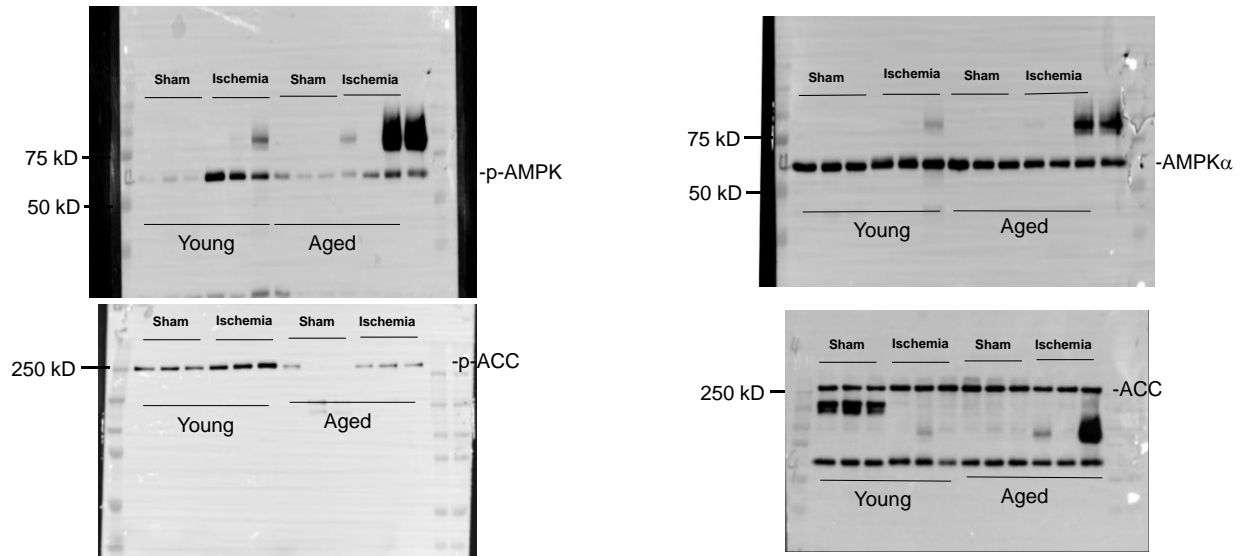

**Figure 2D**

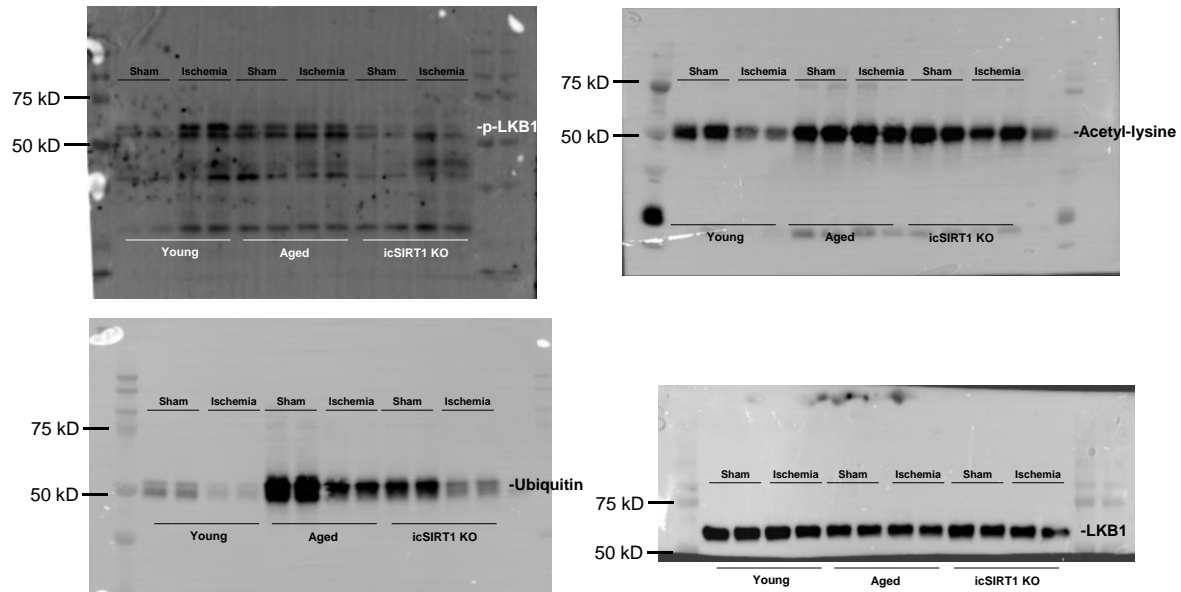

**Figure 5A**

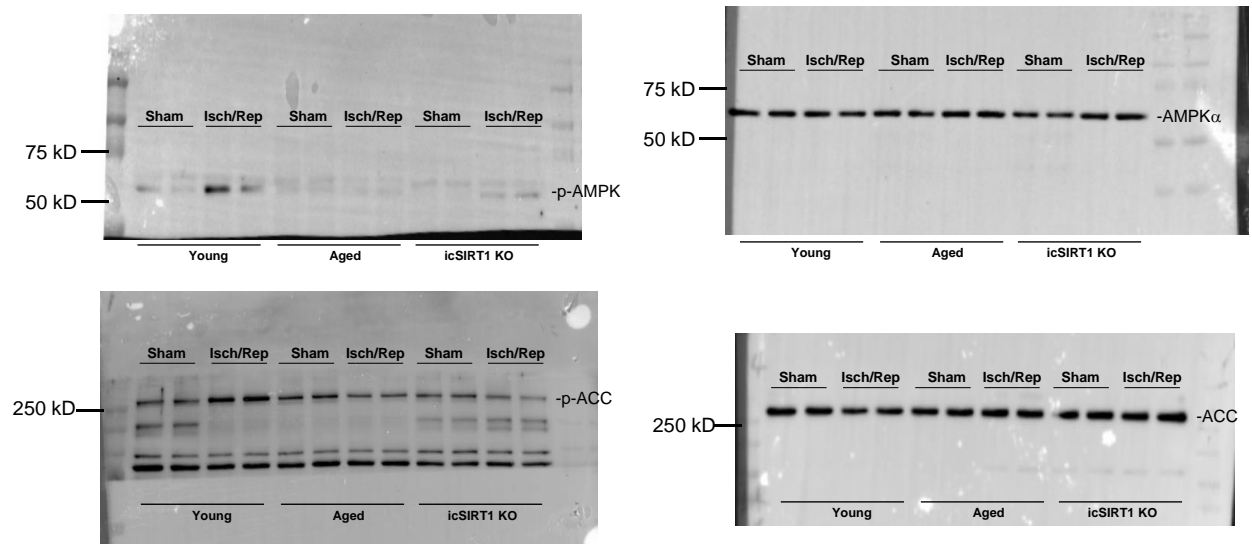

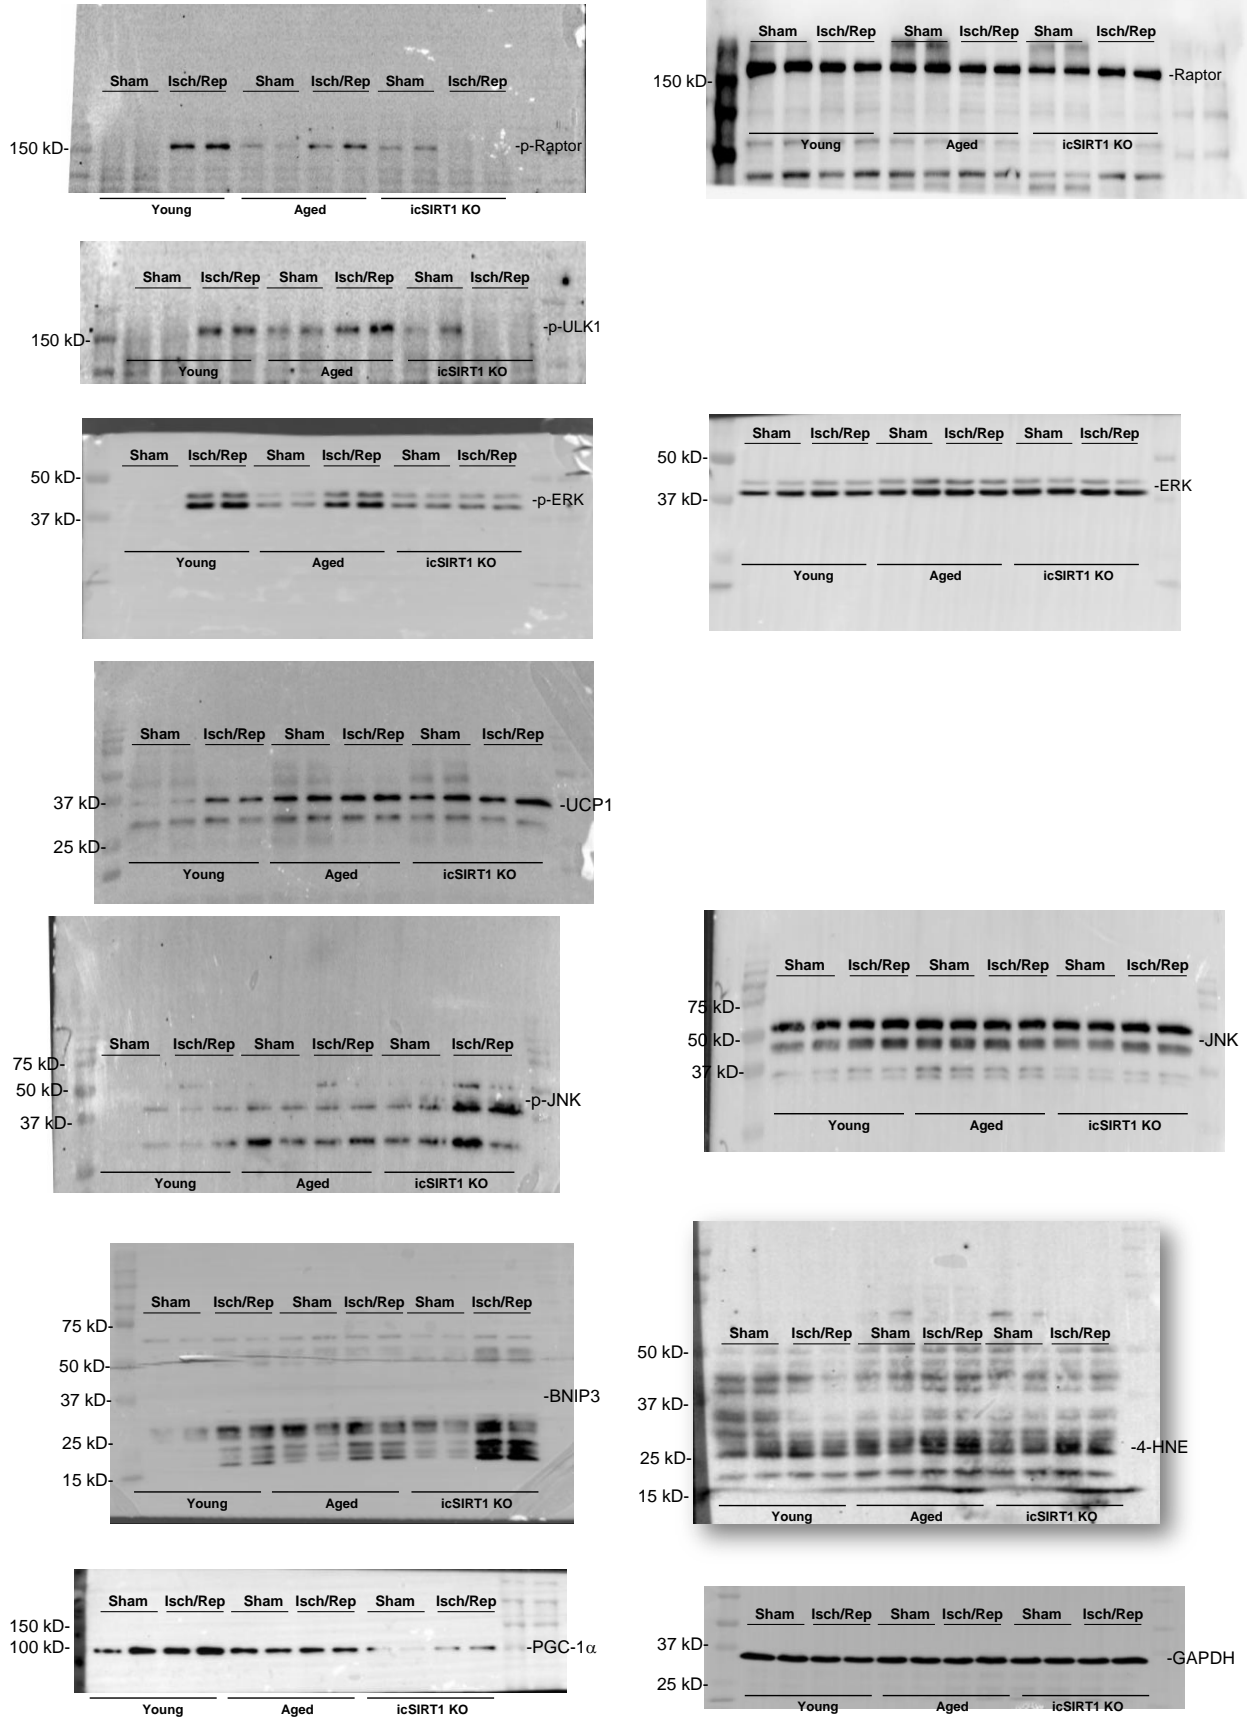

Figure 6A

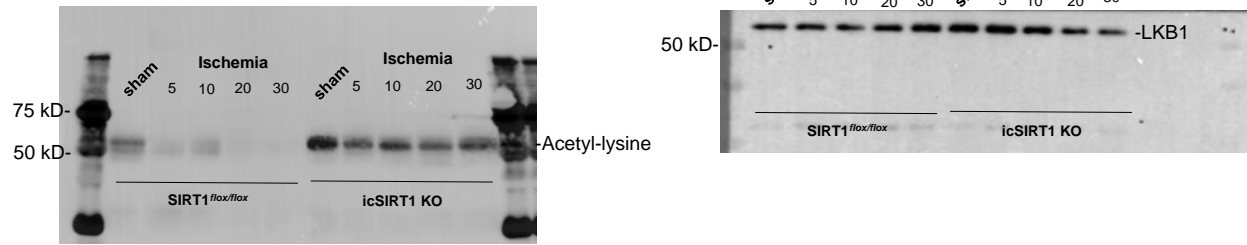

Figure 6B

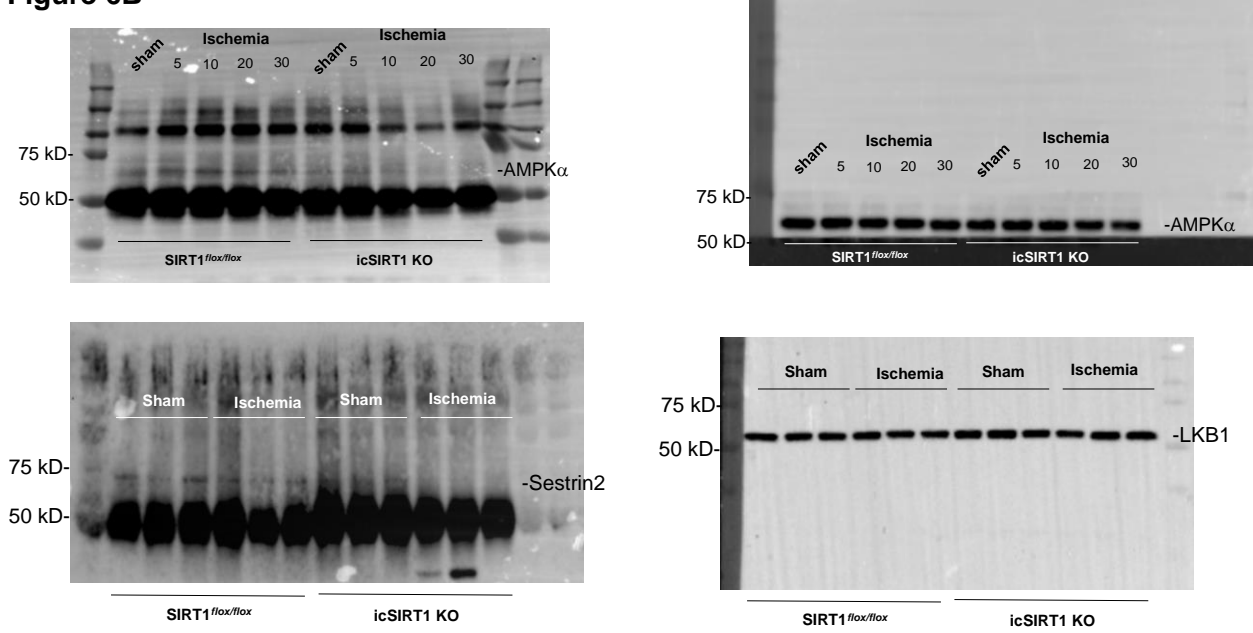

Figure 6C

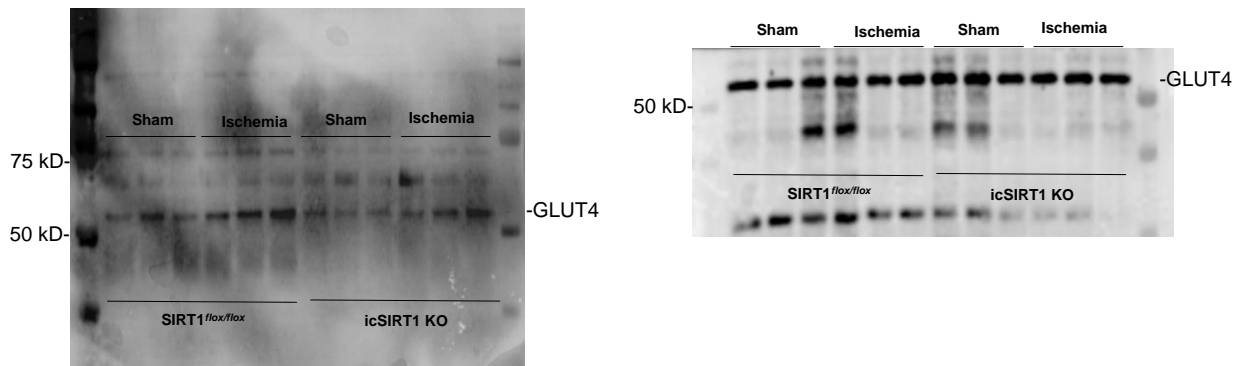

**Figure 6D**

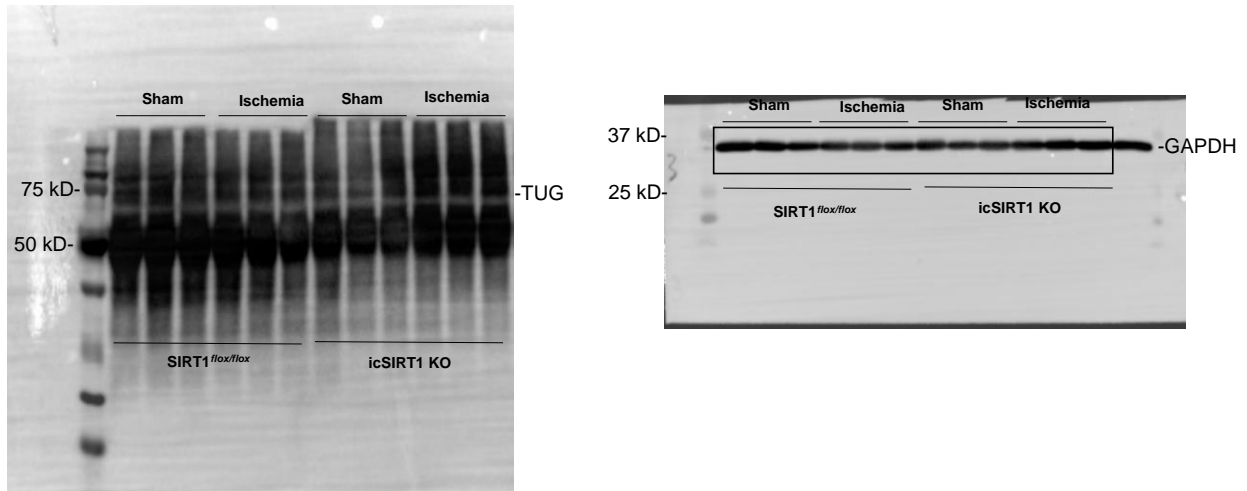

**Figure 6E**

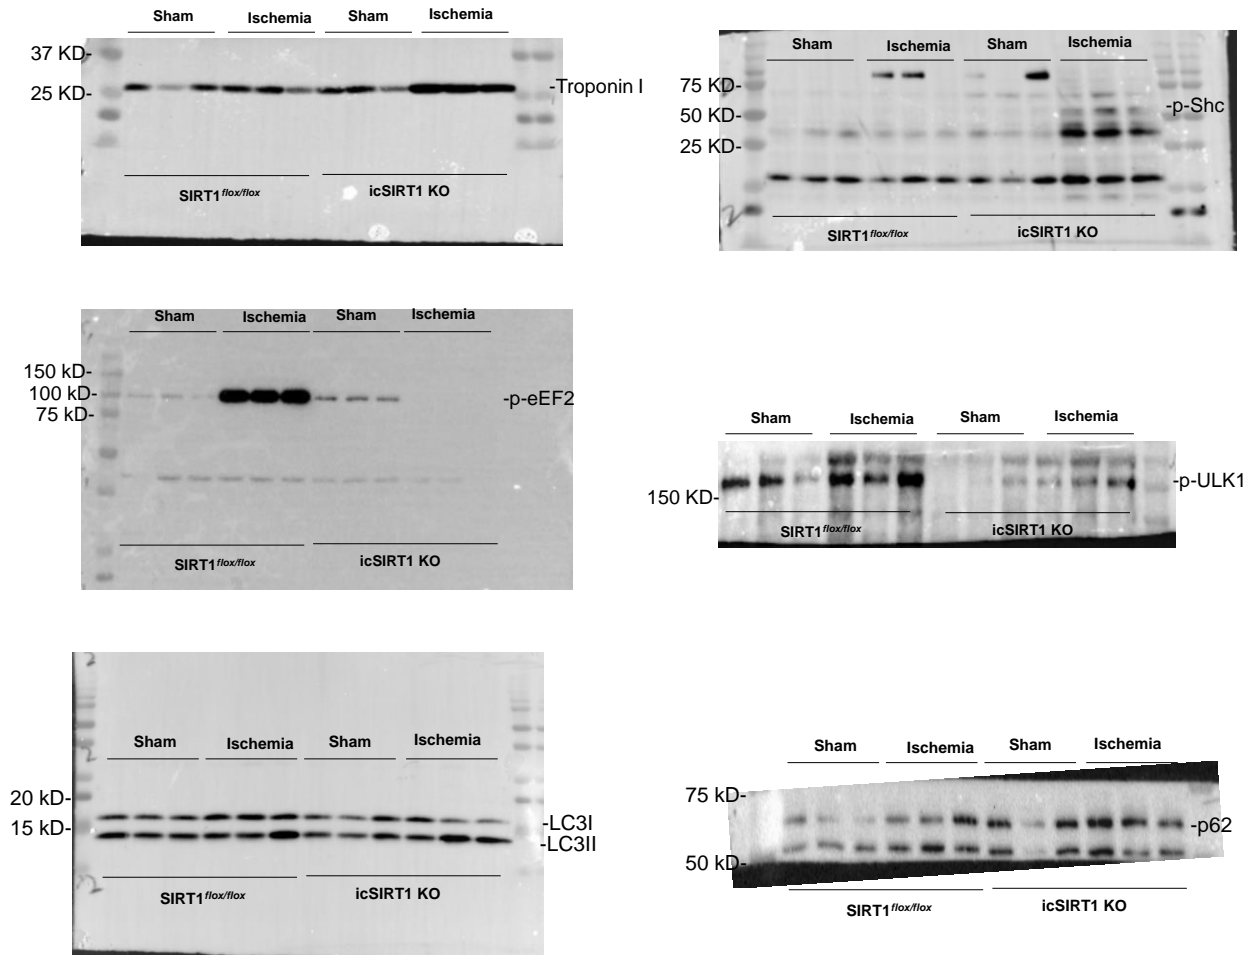



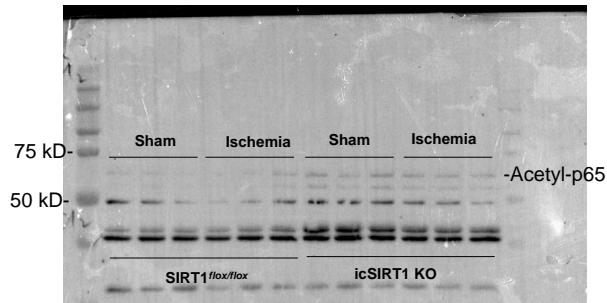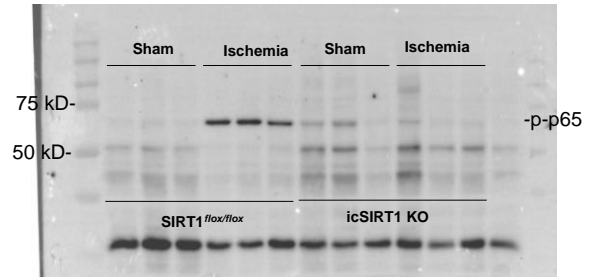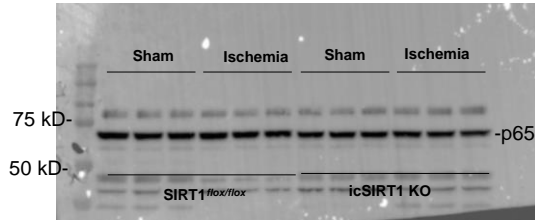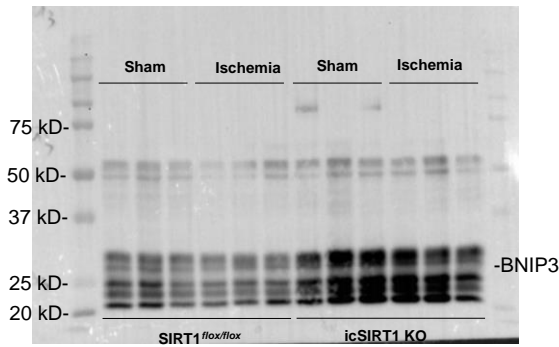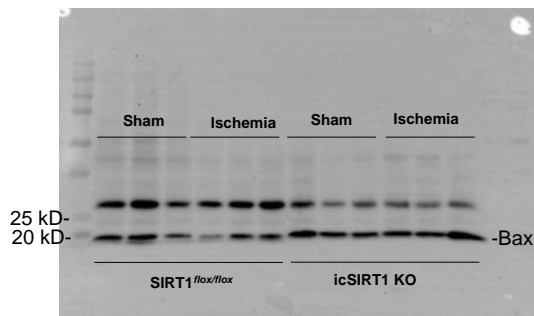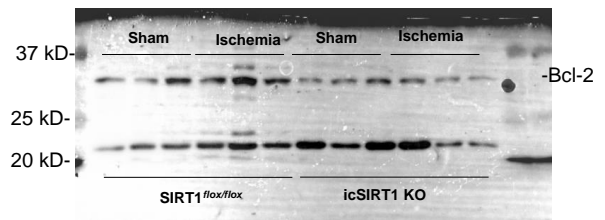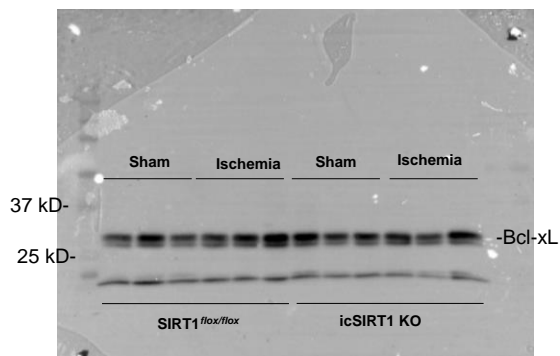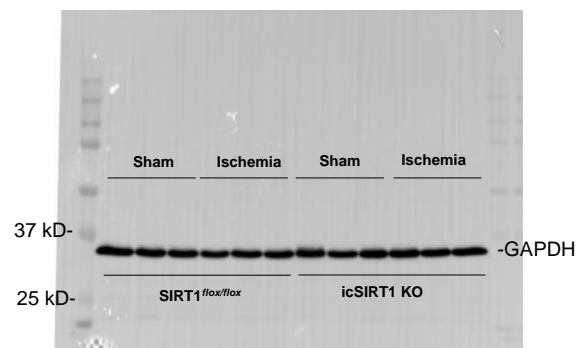

**Figure 7A**

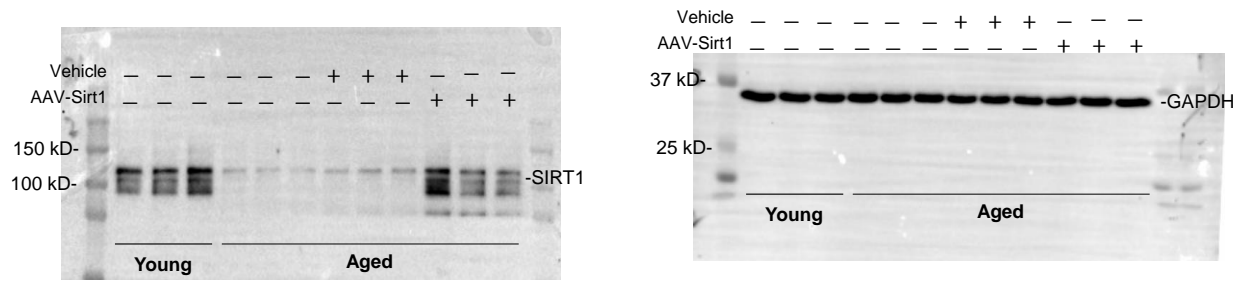

**Figure 7B**

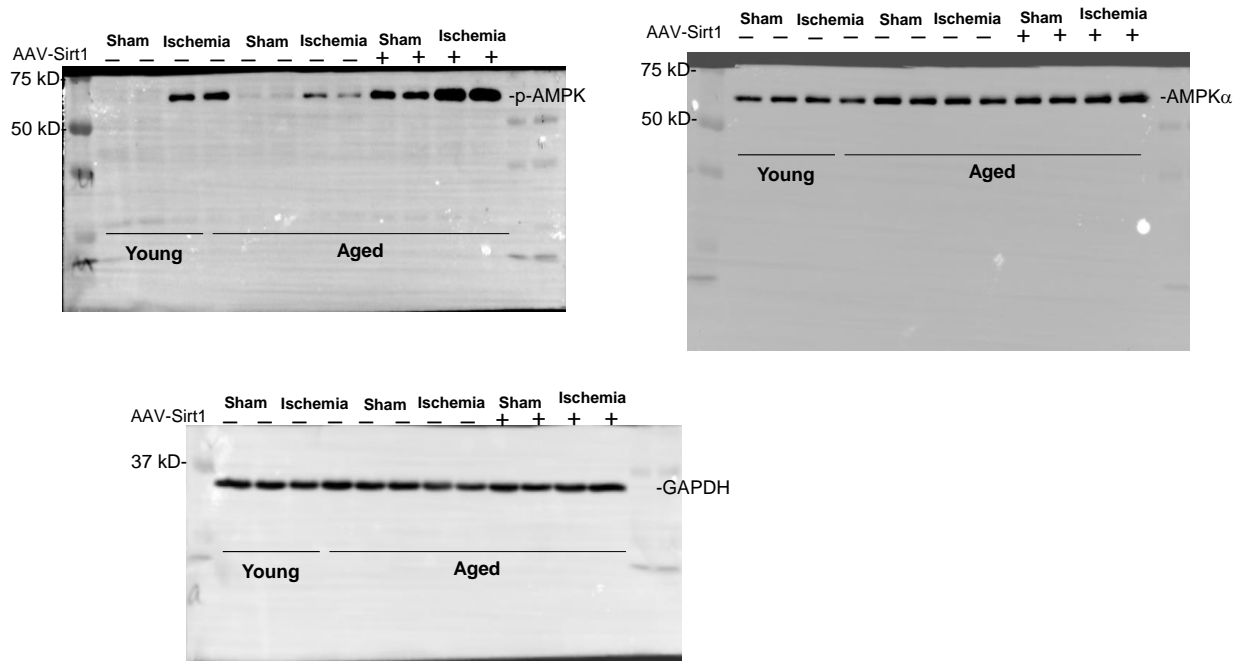

Figure 8D

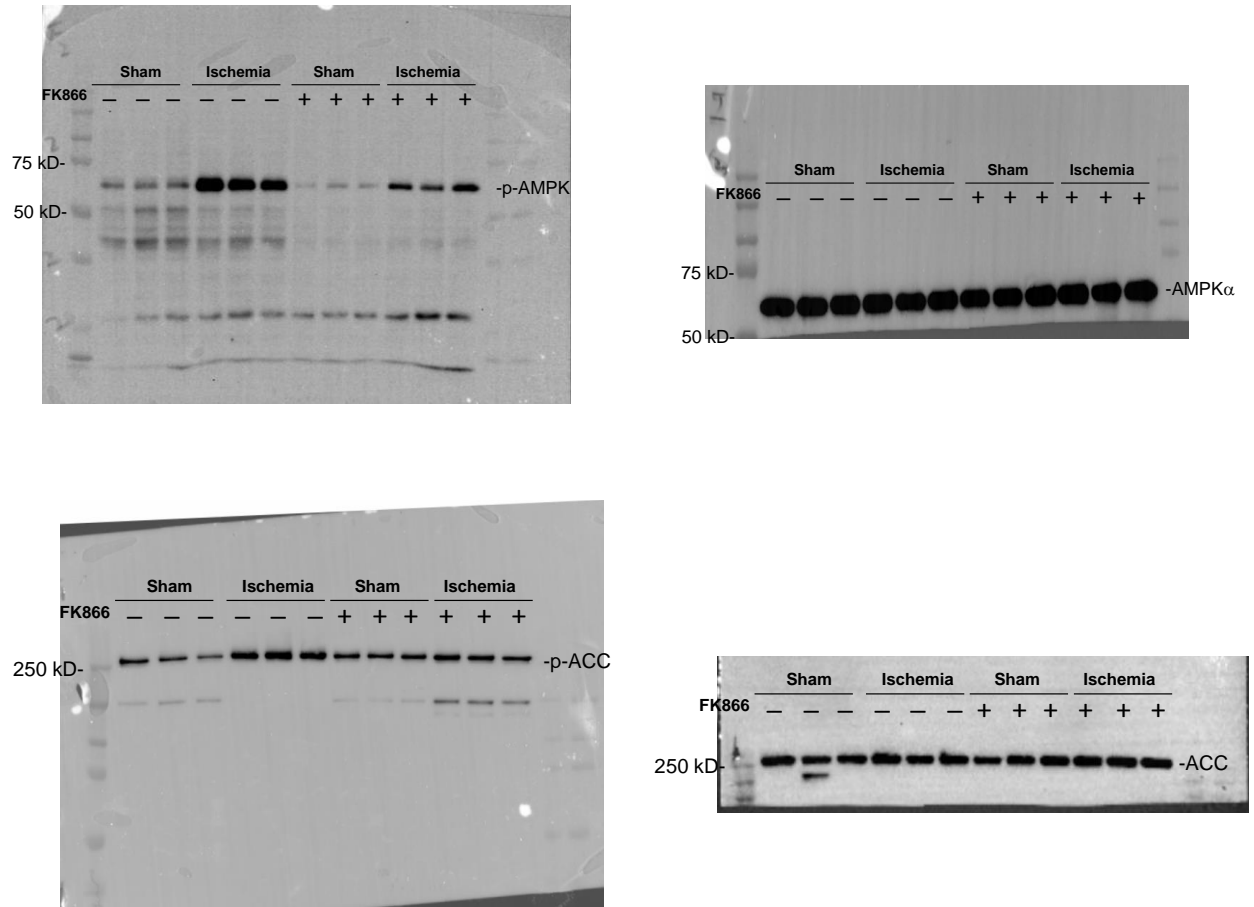

Supplement: cvy033_supplemental_data.pdf [file cvy033_supplemental_data.pdf]
